# Supplementary material
Source: publisher site journal article supplement (https://www.dovepress.com/article/445469)

**supplementary figure 1**: cephalometric analysis of lateral nasopharyngeal films in children with adenoidal tonsillar hypertrophy


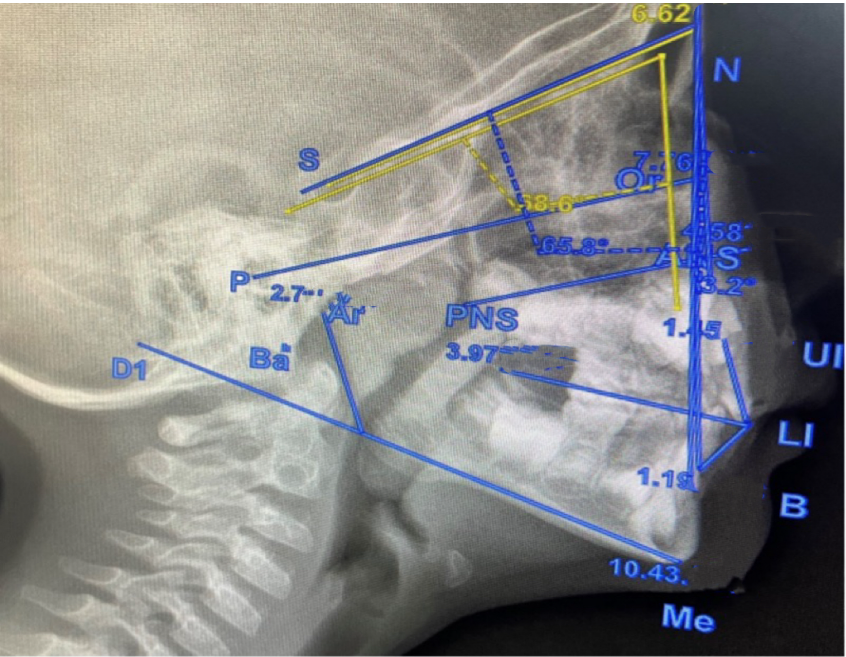

Supplement: Supplementary file 1 [file get_supplementary_file.php]
